# Supplementary material
Source: PubMed Central journal article supplement (PMC4018900)
Supplement: AEM.04034-13_zam999105345so1.pdf [file AEM.04034-13_zam999105345so1.pdf]

**Table S1.** Numerically dominant *Alphaproteobacteria nifH* OTUs<sub>95</sub>

| OTU <sub>95</sub> | Source<br>(# sequences)       | Top blastp hits / % similarity                                                                                                                                                                   |
|-------------------|-------------------------------|--------------------------------------------------------------------------------------------------------------------------------------------------------------------------------------------------|
| 1                 | NCD (22); TNO (9);<br>WIR (6) | <i>Azospirillum amazonense</i> (WP_004274319), <i>Bradyrhizobium</i> sp.<br>BTAi1 (YP_001241772), <i>Bradyrhizobium</i> sp. ORS 278<br>(YP_001207334) / 97-99%                                   |
| 2                 | NCD (15); TNO (9);<br>WIR (6) | <i>Hyphomicrobium</i> sp. MC1 (YP_004677463), <i>Methylocystis</i> sp. SC2<br>(YP_006592725) / 97-98%                                                                                            |
| 3                 | WIR (24)                      | <i>Azospirillum brasilense</i> Sp245 (YP_005030951),<br><i>Gluconacetobacter diazotrophicus</i> PAI 5 (YP_001600720),<br><i>Zymomonas mobilis</i> subsp. <i>mobilis</i> ZM4 (YP_163558) / 93-96% |
| 4                 | NCD (1); TNO (7);<br>WIR (7)  | <i>Bradyrhizobium diazoefficiens</i> USDA 110 (NP_768409),<br><i>Xanthobacter autotrophicus</i> Py2 (YP_001415004) / 95-96%                                                                      |

Figure S1 Collector's curves for *NifH* sequences at different OTU cutoff values

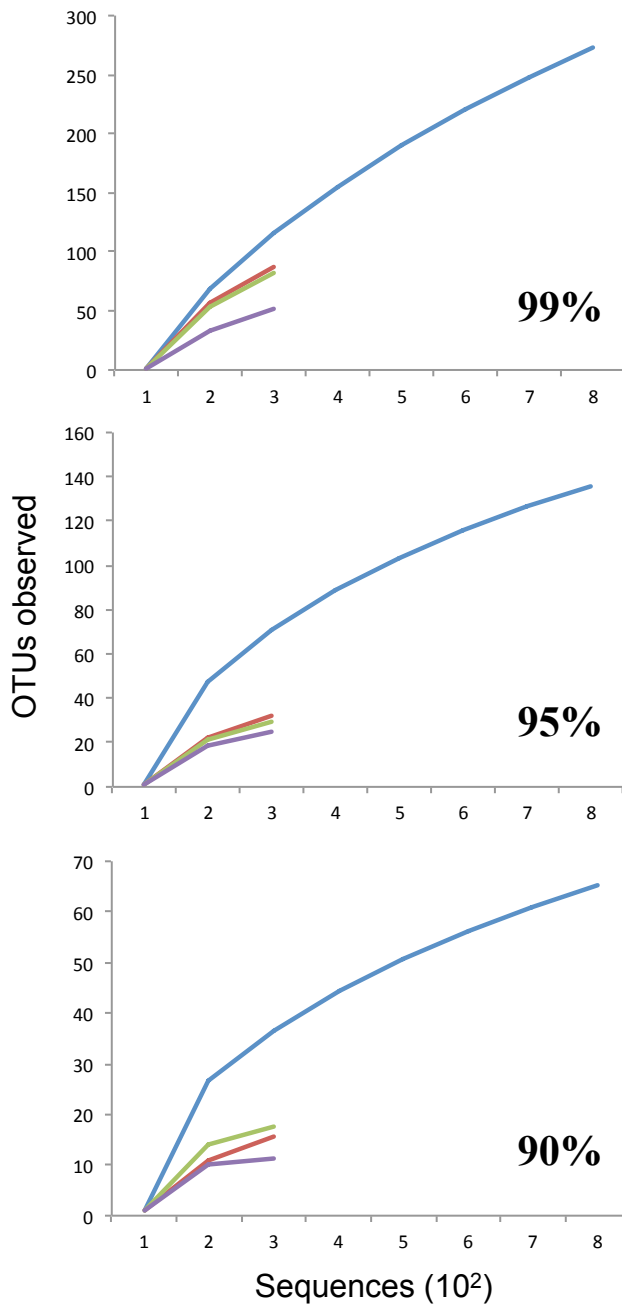

**Figure S1.** Collector's curves for translated *nifH* sequences at different OTU cutoff values. Sequences were pooled by site, from both ambient and elevated CO<sub>2</sub> plots (MDE, blue, 5 ambient and 5 elevated plots; NCD, red, 3 ambient and 3 elevated plots; TNO, green, 2 ambient and 2 elevated plots; WIR, purple, 3 ambient and 3 elevated plots).

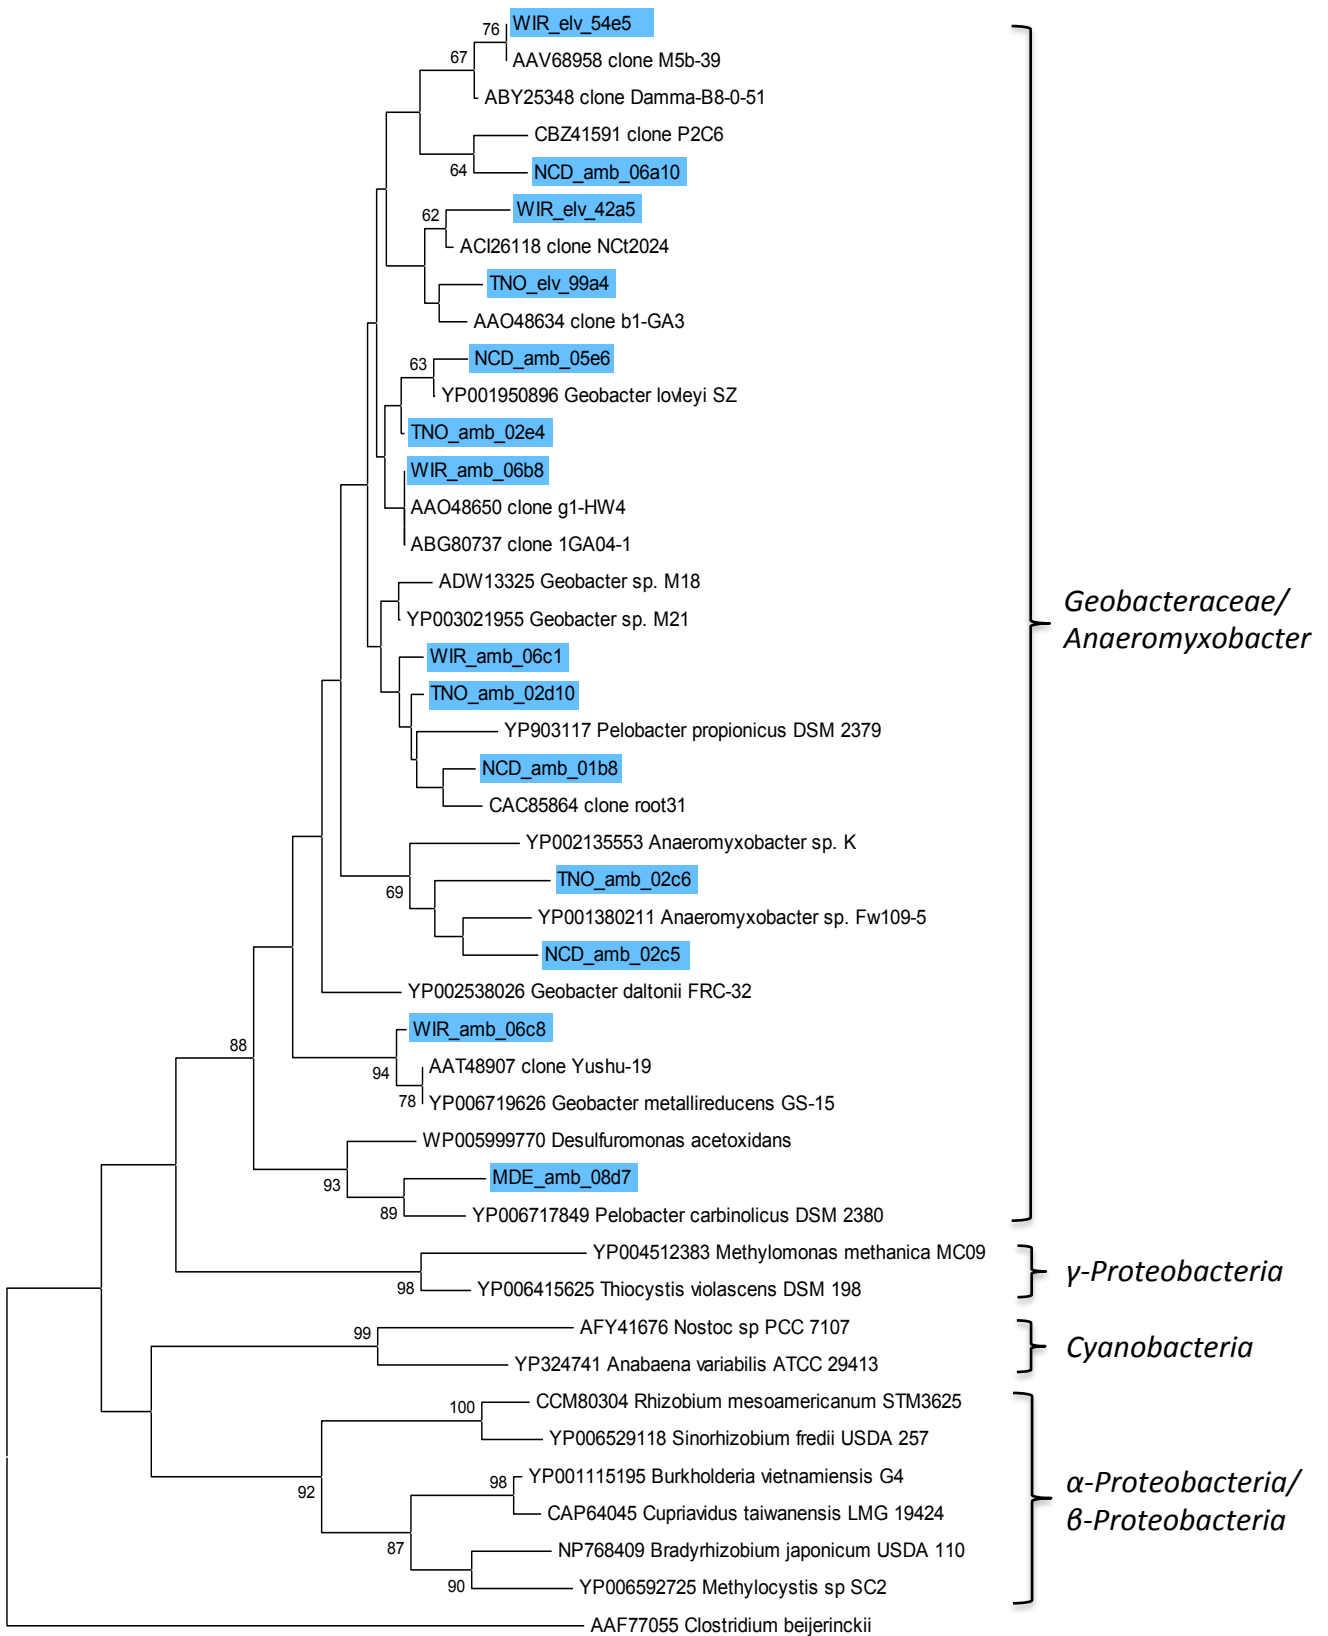

**Figure S2.** Phylogenetic depiction of *Geobacteraceae nifH* sequence diversity. The Neighbor-Joining tree was generated from translated *nifH* sequences (161 amino acids), evolutionary distances were computed using t p-distance method, and ambiguous positions were removed for each pairwise comparison. Sequences from this study are highlighted in blue and designated by site (NCD, TNO, WIR or MDE) and CO<sub>2</sub> treatment (elevated, elv; ambient, amb).
